# Supplementary material
Source: HighWire-hosted journal article supplement (https://bjsm.bmj.com/content/53/1/37)
Supplement: inline-supplementary-material-1 [file inline-supplementary-material-1.docx]

**Supplementary table.** Predictors of increased cardiovascular risk at univariate and multivariate logistic regression analysis.

|  | **Univariate** | | **Multivariate** | | ***Odds Ratio (95% CI)*** |
| --- | --- | --- | --- | --- | --- |
|  | **B** | **P** | **B** | **P** |  |
| Age | 0.09±0.03 | <0.001 | 0.09±0.04 | 0.008 | 1.10 (1.03-1.18) |
| Gender | 0.20±0.33 | 0.550 |  |  |  |
| Height | 0.02±0.01 | 0.101 |  |  |  |
| Weight | 0.05±0.01 | <0.001 |  |  |  |
| BSA | 2.75±0.67 | <0.001 |  |  |  |
| BMI | 0.25±0.04 | <0.001 | 0.14±0.06 | 0.010 | 1.15 (1.03-1.30) |
| Body fat (%) | 1.15±0.03 | <0.001 | 0.11±0.03 | 0.002 | 1.11 (1.04-1.19) |
| Heart rate | 0.03±0.01 | 0.055 |  |  |  |
| Skill disciplines | -0.34±0.36 | 0.353 |  |  |  |
| Power disciplines | 0.24±0.46 | 0.599 |  |  |  |
| Mixed disciplines | -0.44±0.33 | 0.177 |  |  |  |
| Endurance disciplines | 0.80±0.45 | 0.074 |  |  |  |

BSA, body surface area; BMI, body mass index.
